# Supplementary material for: Genome-Wide Identification and Posttranscriptional Regulation Analyses Elucidate Roles of Key Argonautes and Their miRNA Triggers in Regulating Complex Yield Traits in Rapeseed
Source: MDPI journal article supplement (doi:10.3390/ijms24032543), 2023-01-28
Supplement: s1 [file s1]

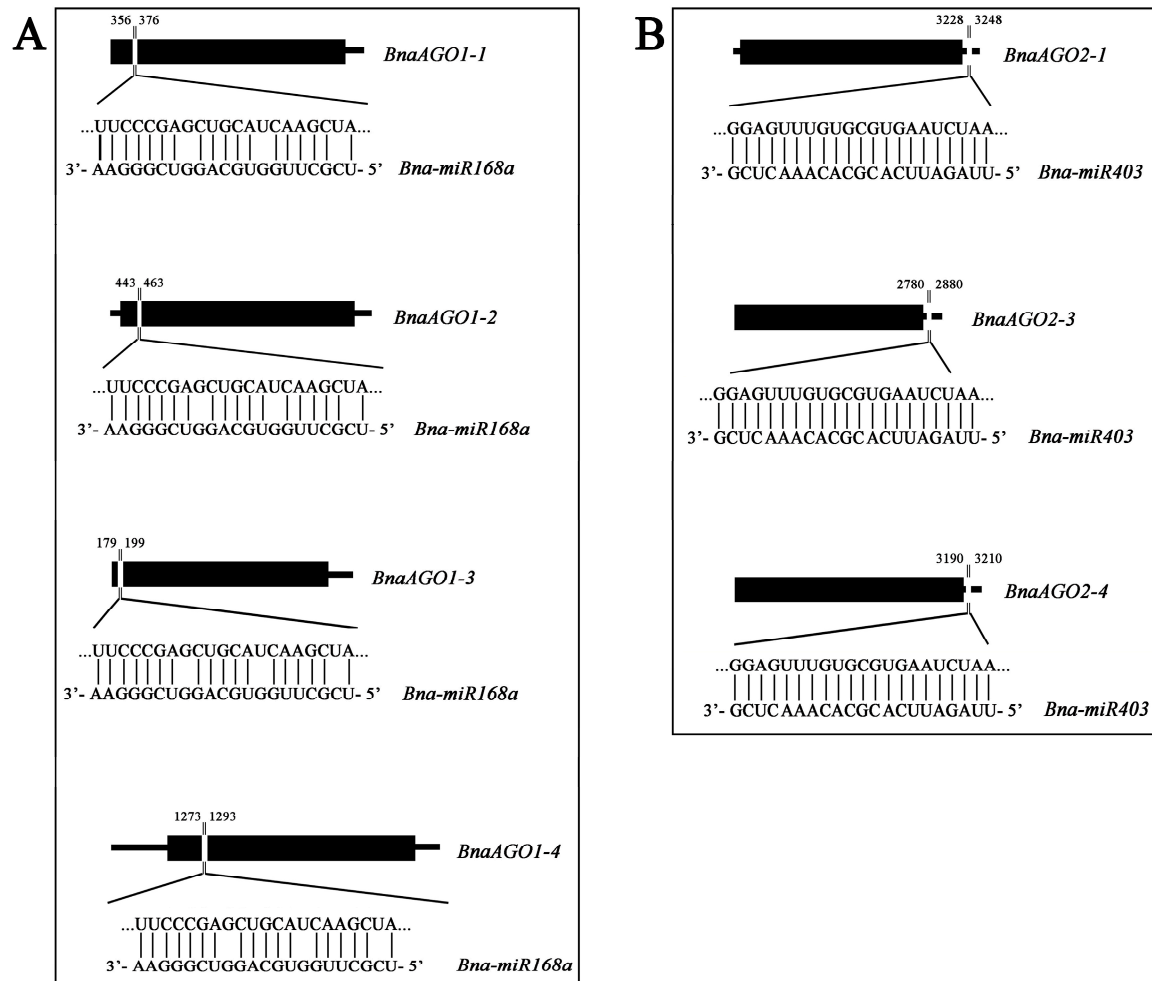

Figure S1: Analysis of the targets set of *B. napus* miR168a and miR403 mediated cleavage of (A) BnaAGO1s and (B) BnaAGO2s.

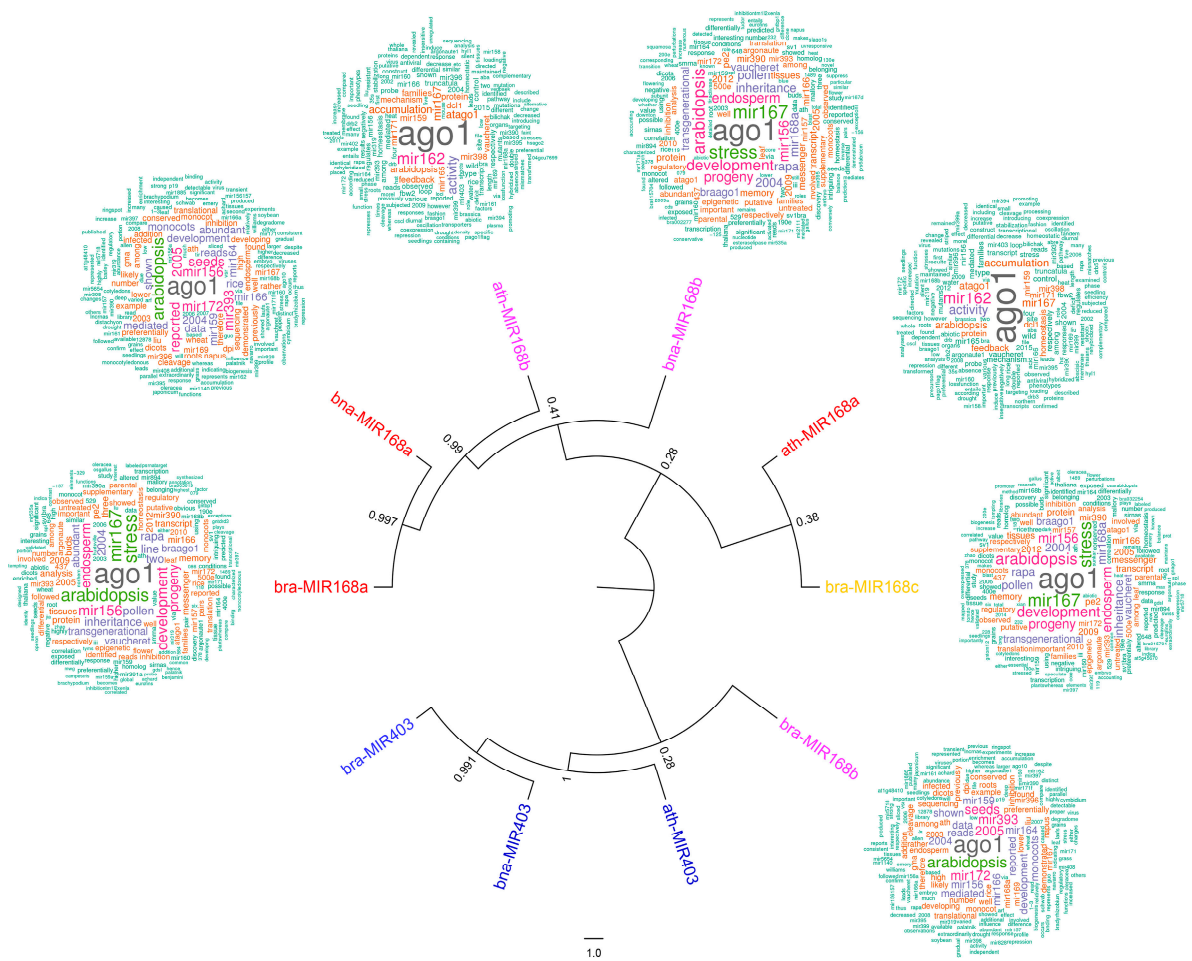

Figure S2: The phylogenetic tree and regulator relationship of miR168 and miR403 among the 4 species.
