# Supplementary material for: Genome-Wide Identification and Posttranscriptional Regulation Analyses Elucidate Roles of Key Argonautes and Their miRNA Triggers in Regulating Complex Yield Traits in Rapeseed
Source: Int J Mol Sci. 2023 Jan 28;24(3):2543. doi: 10.3390/ijms24032543 (PMC9916703; doi:10.3390/ijms24032543)
Supplement: Supplementary file 1 [file ijms-24-02543-s001.zip › Table S1.xlsx]

## Sheet: Sheet1
Table S1. Homologous genes among the A and C sub-genomes of B. napus, B. rapa, B. oleracea and their homologs in Arabidopsis
Gene ID (At)	At. Name	Gene ID (Bra)	Gene Name (Bra)	Gene ID (BnaA)	Gene Name (BnaA)	Gene ID (Bol)	Gene Name (Bol)	Gene ID (BnaC)	Gene Name (BnaC)
AT1G48410	AtAGO1	Bra014136	BraAGO1-1	BnaA08g03260D	BnaAGO1-2	Bol021885	BolAGO1-1	BnaC08g46720D	BnaAGO1-1
		Bra032254	BraAGO1-2	BnaA05g17460D	BnaAGO1-4	Bol043177	BolAGO1-2	BnaC05g25730D	BnaAGO1-3
AT1G31280	AtAGO2	Bra040815	BraAGO2-1	BnaA05g14760D	BnaAGO2-1	Bol026737	BolAGO2-1	BnaC06g41790D	BnaAGO2-2
		Bra023172	BraAGO2-2	BnaA09g25290D	BnaAGO2-4	Bol011665	BolAGO2-2	BnaCnng68320D	BnaAGO2-3
AT1G31290	AtAGO3	-	-	-	-	-	-	-	-
AT2G27040	AtAGO4	Bra034318	BraAGO4	BnaA07g13010D	BnaAGO4-2	Bol027788	BolAGO4-1	BnaC04g54830D	BnaAGO4-1
		-	-	BnaA04g15560D	BnaAGO4-3	Bol026467	BolAGO4-2	BnaC04g38560D	BnaAGO4-4
AT2G27880	AtAGO5	Bra011993	BraAGO5	BnaA07g13430D	BnaAGO5-1	Bol013433	BolAGO5	BnaC04g16450D	BnaAGO5-2
AT2G32940	AtAGO6	Bra022918	BraAGO6	BnaA03g15180D	BnaAGO6-1	Bol001039	BolAGO6	BnaC03g18310D	BnaAGO6-2
AT1G69440	AtAGO7	Bra003999	BraAGO7	BnaA07g24280D	BnaAGO7-1	Bol017346	BolAGO7-1	BnaC06g43420D	BnaAGO7-2
						Bol028572	BolAGO7-2	BnaC02g19190D	BnaAGO7-3
AT5G21030	AtAGO8	-	-	-	-	-	-	-	-
AT5G21150	AtAGO9	Bra002361	BraAGO9-1	BnaA10g14450D	BnaAGO9-2	Bol035759	BolAGO9-1	BnaCnng35060D	BnaAGO9-1
		Bra020152	BraAGO9-2	BnaA02g05290D	BnaAGO9-3	Bol036081	BolAGO9-2	-	-
AT5G43810	AtAGO10	Bra033698	BraAGO10	BnaA06g36540D	BnaAGO10-1	Bol002038	BolAGO10	BnaC07g17330D	BnaAGO10-2
