# Supplementary material for: Genome-Wide Identification and Posttranscriptional Regulation Analyses Elucidate Roles of Key Argonautes and Their miRNA Triggers in Regulating Complex Yield Traits in Rapeseed
Source: Int J Mol Sci. 2023 Jan 28;24(3):2543. doi: 10.3390/ijms24032543 (PMC9916703; doi:10.3390/ijms24032543)
Supplement: Supplementary file 1 [file ijms-24-02543-s001.zip › Table S2.xlsx]

## Sheet: Sheet1
Table S2. Syntenic relationships of AGOs among the four species
Gene name A	Gene name B
BraAGO1-1	AtAGO1
BraAGO1-2	AtAGO1
BraAGO10	AtAGO10
BraAGO2-2	AtAGO2
BolAGO4-2	AtAGO4
BraAGO4	AtAGO4
BraAGO5	AtAGO5
BraAGO6	AtAGO6
BolAGO7-1	AtAGO7
BolAGO7-2	AtAGO7
BraAGO7	AtAGO7
BolAGO9-2	AtAGO9
BraAGO9-1	AtAGO9
BraAGO9-2	AtAGO9
AtAGO10	BnaAGO10-1
BraAGO10	BnaAGO10-1
AtAGO10	BnaAGO10-2
BnaAGO10-1	BnaAGO10-2
BraAGO10	BnaAGO10-2
AtAGO1	BnaAGO1-2
BolAGO1-1	BnaAGO1-2
BolAGO1-2	BnaAGO1-2
BraAGO1-1	BnaAGO1-2
BraAGO1-2	BnaAGO1-2
BnaAGO1-4	BnaAGO1-3
BolAGO1-2	BnaAGO1-3
BraAGO1-2	BnaAGO1-3
BolAGO1-2	BnaAGO1-4
BraAGO1-2	BnaAGO1-4
BolAGO2-1	BnaAGO2-1
AtAGO2	BnaAGO2-4
BraAGO2-2	BnaAGO2-4
BnaAGO4-3	BnaAGO4-2
BolAGO4-1	BnaAGO4-2
BraAGO4	BnaAGO4-2
AtAGO4	BnaAGO4-3
BolAGO4-2	BnaAGO4-3
BraAGO4	BnaAGO4-3
AtAGO4	BnaAGO4-4
BnaAGO4-3	BnaAGO4-4
BolAGO4-2	BnaAGO4-4
BraAGO4	BnaAGO4-4
AtAGO5	BnaAGO5-1
BraAGO5	BnaAGO5-1
AtAGO5	BnaAGO5-2
BnaAGO5-1	BnaAGO5-2
BraAGO5	BnaAGO5-2
AtAGO6	BnaAGO6-1
BraAGO6	BnaAGO6-1
AtAGO6	BnaAGO6-2
BnaAGO6-1	BnaAGO6-2
BraAGO6	BnaAGO6-2
AtAGO7	BnaAGO7-1
BolAGO7-1	BnaAGO7-1
BraAGO7	BnaAGO7-1
BnaAGO7-1	BnaAGO7-2
BolAGO7-1	BnaAGO7-2
BraAGO7	BnaAGO7-2
AtAGO7	BnaAGO7-3
BnaAGO7-1	BnaAGO7-3
BolAGO7-2	BnaAGO7-3
BraAGO7	BnaAGO7-3
BnaAGO9-2	BnaAGO9-1
BolAGO9-1	BnaAGO9-2
AtAGO9	BnaAGO9-3
BolAGO9-2	BnaAGO9-3
BraAGO9-1	BnaAGO9-3
BraAGO9-2	BnaAGO9-3
BraAGO1-1	BolAGO1-1
BraAGO1-2	BolAGO1-2
BraAGO4	BolAGO4-2
BraAGO7	BolAGO7-1
BraAGO7	BolAGO7-2
BraAGO9-1	BolAGO9-2
BraAGO9-2	BolAGO9-2
BraAGO1-2	BraAGO1-1
BraAGO9-2	BraAGO9-1
