# Supplementary material for: Genome-Wide Identification and Posttranscriptional Regulation Analyses Elucidate Roles of Key Argonautes and Their miRNA Triggers in Regulating Complex Yield Traits in Rapeseed
Source: Int J Mol Sci. 2023 Jan 28;24(3):2543. doi: 10.3390/ijms24032543 (PMC9916703; doi:10.3390/ijms24032543)
Supplement: Supplementary file 1 [file ijms-24-02543-s001.zip › Table S3.xlsx]

## Sheet: HI
	LHI_0J	HHI_0J	LHI_30J	HHI_30J	LHI_L	HHI_L	LHI_7P	HHI_7P	LHI_14P	HHI_14P	LHI_21P	HHI_21P	LHI_30P	HHI_30P	LHI_7S	HHI_7S	LHI_14S	HHI_14S	LHI_21S	HHI_21S	LHI_30S	HHI_30S
BnaAGO4-1	11.3979	12.1123	12.5677	16.0284	10.9268	9.31835	22.3605	19.8054	14.1721	15.3231	11.8913	9.56345	10.7122	10.1449	44.2731	48.7825	25.1033	16.778	21.7306	26.5895	37.0897	88.6879
BnaAGO4-2	3.76666	6.0163	3.03691	6.67036	2.59173	3.5791	6.85758	11.8104	3.90981	7.9904	3.04747	4.51879	2.4317	3.461	16.8196	22.6575	6.6631	7.8275	11.9935	23.099	31.3281	87.6551
BnaAGO4-3	3.12599	6.16976	2.60967	8.0847	1.5252	2.63799	8.61872	24.8859	4.97705	10.2247	3.51408	5.25708	2.16486	5.24623	35.3704	51.6806	31.8731	16.9329	18.5728	33.936	24.2192	93.8884
BnaAGO4-4	7.56198	7.35712	7.70204	9.67638	3.08909	3.20181	32.4372	30.0701	16.6891	13.0205	11.0666	8.18192	6.54177	6.22213	100.575	75.6179	71.5032	23.018	45.4674	46.0078	62.3729	142.472
BnaAGO9-1	0.00743052	0.0176842	0	0	0.0762726	0.0388315	0.0184503	0	0.00998485	0.00574435	0.0380423	0.0181193	0.00876582	0.00960368	0	0	0.0095972	0	1.27653	0.666854	0.228621	0.701165
BnaAGO9-2	0.00913565	0	0	0	0	0	0	0.00675529	0	0.0557952	0.0190676	0.0342499	0	0	0.0382824	0.020588	0.0288619	0.131187	2.04146	1.18543	0.0143566	0.00966154
BnaAGO9-3	0.234733	0.927424	3.65666	5.87526	1.48833	1.21603	28.8611	13.3176	2.82876	1.01107	0.607632	0.227532	1.43125	1.53133	245.504	132.312	116.094	28.0732	49.8919	22.5866	12.6557	1.49028
BnaAGO6-1	0.398364	0.363088	0.524366	0.29724	0.393703	0.209089	1.04609	1.26775	0.670759	0.8465	0.474644	0.462904	0.329663	0.481448	2.30883	3.31879	1.91984	1.63165	1.50573	2.01698	3.75051	4.62752
BnaAGO6-2	0.445323	0.643649	0.320006	0.566693	0.410172	0.313235	0.40733	0.445976	0.327784	0.265328	0.342237	0.35052	0.189901	0.234256	2.81488	0.49627	2.36106	0.42611	1.70631	1.43233	2.4567	3.95951
BnaAGO7-1	1.79739	2.28796	0.777743	1.49876	1.09819	1.97867	0.621834	0.319029	0.40108	0.297638	1.04684	1.55123	1.89784	1.20153	2.1446	0.653021	0.0865997	0.029957	0.13729	0.604917	1.98669	1.44448
BnaAGO7-2	1.92838	2.44923	0.796043	2.02424	0.533727	1.11283	0.468622	0.281718	0.22633	0.0949795	0.966957	1.32303	1.57479	1.32319	0.931731	0.178572	0.142612	0.18186	0.132219	0.646812	0.788138	0.716445
BnaAGO7-3	1.76366	1.9323	1.00201	1.43222	1.18208	0.982001	0.0999187	0.144673	0.47274	0.504832	0.408916	1.43345	1.45442	2.02317	0.01514	0	0.0767147	0.0771059	0.0867306	0.251469	0.357126	0.53784
BnaAGO2-1	10.3039	2.49675	8.37519	4.37843	5.9618	4.89596	2.33158	3.22912	10.9056	6.75316	7.08978	13.9453	3.74703	9.69079	8.54111	8.12365	53.9804	32.8477	62.9743	23.6183	5.56175	5.44142
BnaAGO2-2	15.8571	0.0805863	10.5244	0.0279454	4.82278	0.00964151	3.68337	0.0821416	16.7392	0.0870293	6.39884	0.100411	4.89447	0.154691	13.9272	0	48.2608	0.189999	36.9555	0.0551422	8.91423	0.0789667
BnaAGO2-3	24.7582	7.34387	8.79575	8.92508	5.2467	9.52358	6.08817	10.0143	36.2191	9.4593	14.8526	28.2086	6.61671	11.0951	13.3544	15.8879	43.7913	12.7705	26.0492	10.1334	6.20032	4.59371
BnaAGO2-4	15.8191	5.98692	6.63927	9.07673	4.60836	7.44345	2.21869	4.59931	12.4084	4.78576	5.6837	10.5084	3.04831	5.72929	4.34376	5.46273	14.737	6.45619	13.5802	6.06757	5.57283	4.77731
BnaAGO5-1	1.85607	3.17831	4.26952	5.80721	1.19098	2.82393	6.28501	9.07539	4.10484	4.25333	4.37241	6.23559	11.6496	6.14107	20.3225	17.0784	33.4294	17.5616	31.2917	38.4083	5.77585	2.06384
BnaAGO5-2	8.77042	11.8188	14.2337	14.8214	6.50698	6.52953	20.1761	21.0353	17.19	21.0517	32.2204	36.9856	17.0168	17.2217	69.2164	43.9393	92.097	43.8116	83.6705	44.9048	12.0923	4.79333
BnaAGO10-1	5.088	8.28575	3.82795	7.35524	2.8709	5.73986	7.0796	9.63104	4.5623	4.4767	5.78094	4.43585	2.93309	2.68832	2.92001	3.72849	2.22758	2.65772	1.13496	4.86108	15.7425	19.2696
BnaAGO10-2	2.944	4.55281	3.07034	4.28537	3.15507	4.30657	6.71615	8.78776	4.80195	4.65808	4.87902	4.67946	3.3518	2.23892	4.54098	4.86554	3.33394	2.61957	1.47829	2.19729	9.5993	11.719
BnaAGO1-1	16.3161	25.2726	7.82474	20.5591	9.84213	11.7004	13.6926	14.4575	8.58175	11.8865	8.41897	12.3272	6.83925	11.1042	39.8084	42.6549	37.029	19.4339	40.0767	32.1285	27.8127	22.1289
BnaAGO1-2	11.3804	9.90902	5.0502	11.8878	5.22853	4.92187	6.84108	5.02166	4.69468	3.68502	3.76094	4.91675	4.37703	4.41496	27.418	18.216	20.2023	7.7306	17.5137	10.9007	14.4765	12.1986
BnaAGO1-3	20.2847	17.0687	15.7562	14.3141	17.3945	14.3874	15.0884	14.0828	12.4093	11.8442	14.4288	15.234	15.257	17.3372	26.4835	24.4662	24.8265	16.1806	24.9194	21.3687	17.6353	16.4545
BnaAGO1-4	6.40699	12.3673	4.77856	12.0366	4.59962	7.6434	4.53142	5.30783	3.38037	4.7088	4.10158	8.53845	4.01139	6.52706	7.79507	7.53497	7.00156	6.51725	6.85983	10.7322	4.43982	11.4502

## Sheet: TSW
	LTSW_15P	HTSW_15P	LTSW_35P	HTSW_35P	LTSW_15S	HTSW_15S	LTSW_35S	HTSW_35S
BnaAGO4-1	14.2499	14.3084	9.17883	9.40853	40.9914	44.994	49.9561	60.2009
BnaAGO4-2	8.2094	7.98127	4.68497	3.74463	17.1063	17.696	50.4449	65.7346
BnaAGO4-3	11.5164	13.2428	4.38063	6.2488	54.6369	70.3049	44.9206	75.5251
BnaAGO4-4	23.5966	19.4571	8.11617	8.10657	99.6187	99.3783	102.58	109.902
BnaAGO9-1	0	0	0	0.0399667	0.00765	0.0388667	0.746633	2.18607
BnaAGO9-2	0.0049	0	0	0	0.11445	0.00553333	0	0.0101333
BnaAGO9-3	3.10003	0.905033	2.013	0.1463	111.163	98.906	18.5199	12.4414
BnaAGO6-1	2.21573	1.76283	0.361567	0.7822	4.25945	4.23233	5.83557	6.10343
BnaAGO6-2	1.12527	1.6684	0.5192	1.08037	5.8636	4.7523	4.51283	5.90837
BnaAGO7-1	1.63533	0.791967	4.94973	4.95507	0.3073	0.4369	1.40893	2.36513
BnaAGO7-2	2.36753	0.6056	4.24767	3.34153	0.8717	0.409967	0.7733	1.05857
BnaAGO7-3	0.0091	1.53703	0.4347	4.28763	0.01425	0.0459333	0.1138	0.803867
BnaAGO2-1	25.6093	8.74323	16.6646	13.2637	103.386	44.4976	16.3275	11.9338
BnaAGO2-2	46.5835	26.8852	20.3252	26.8109	102.494	76.4192	30.6767	22.6519
BnaAGO2-3	59.0598	32.4429	51.7397	40.2398	101.047	44.6292	15.0529	8.30553
BnaAGO2-4	23.779	21.6462	20.0016	44.6336	40.159	20.6791	16.6453	16.459
BnaAGO5-1	31.1027	19.8706	14.3853	13.4089	59.0007	65.7885	3.2817	4.03953
BnaAGO5-2	58.5024	60.6006	27.6388	40.4664	157.663	170.788	17.4603	26.5396
BnaAGO10-1	8.69353	9.9317	4.56503	2.10243	6.68915	2.64683	15.1993	25.7851
BnaAGO10-2	12.0765	10.3649	5.5531	2.60127	8.7303	4.13653	12.8154	19.835
BnaAGO1-1	9.43617	25.8579	8.95603	15.1827	55.8182	87.0238	35.6531	56.7478
BnaAGO1-2	8.41863	12.5781	8.90983	10.1436	54.9147	42.3178	39.0301	34.7147
BnaAGO1-3	21.0676	28.323	23.3581	34.6566	46.4426	68.7145	35.9226	40.9999
BnaAGO1-4	13.3318	13.6667	13.4386	17.6543	27.4784	36.9925	15.1635	19.0608

## Sheet: SPS 
	LSPS-Pi	HSPS-Pi	LSPS-Si	HSPS-Si
BnaAGO4-1	33.0214	35.1376	20.2435	28.8055
BnaAGO4-2	24.2543	26.392	10.5214	18.6979
BnaAGO4-3	60.3664	62.9822	31.9808	43.8684
BnaAGO4-4	96.3807	93.7523	51.7348	79.1274
BnaAGO9-1	0.01083	0.0115033	0.115354	0.0373717
BnaAGO9-2	0	0.027751	0.0922817	0.088093
BnaAGO9-3	158.588	149.408	54.2655	106.572
BnaAGO6-1	5.54821	5.15494	2.62969	4.28229
BnaAGO6-2	9.60887	10.3352	5.10864	6.67049
BnaAGO7-1	2.95145	5.8368	1.50364	3.32334
BnaAGO7-2	2.95007	1.92177	1.02827	0.506481
BnaAGO7-3	0.223277	0.762353	0.246673	0.340123
BnaAGO2-1	6.31714	9.13894	20.8692	18.2053
BnaAGO2-2	21.9952	30.9746	26.3927	29.5033
BnaAGO2-3	29.8645	38.8632	40.1942	33.963
BnaAGO2-4	16.5835	23.1949	17.565	13.2292
BnaAGO5-1	28.0094	26.9607	30.7293	34.6717
BnaAGO5-2	66.527	69.8678	72.0161	85.0389
BnaAGO10-1	30.5428	31.503	10.5912	9.67582
BnaAGO10-2	26.0106	27.9289	12.634	11.8957
BnaAGO1-1	47.6441	42.4139	36.9464	30.9173
BnaAGO1-2	48.4807	47.9045	29.1231	34.4159
BnaAGO1-3	52.4438	57.5173	41.5371	43.9986
BnaAGO1-4	33.7228	36.0513	23.5111	24.258

## Sheet: IEN
	LIEN-Bu	HIEN-Bu	LIEN-Pi	HIEN-Pi
BnaAGO4-1	13.5988	13.4423	26.6628	28.3251
BnaAGO4-2	14.6014	12.1483	20.0994	21.1006
BnaAGO4-3	18.574	17.4503	37.0029	49.279
BnaAGO4-4	34.4196	29.4653	76.8831	79.4205
BnaAGO9-1	0.006058	0.01279	0.00432633	0.00571467
BnaAGO9-2	0.00420067	0.00326467	0.007217	0.00589167
BnaAGO9-3	13.6934	36.065	122.539	122.041
BnaAGO6-1	2.85456	2.314	5.13185	5.00409
BnaAGO6-2	4.35613	3.33973	8.403	8.99951
BnaAGO7-1	1.04241	0.943462	2.84816	3.04895
BnaAGO7-2	0.81727	0.789374	1.62153	1.44213
BnaAGO7-3	0.106593	0.357476	0.13078	0.328831
BnaAGO2-1	6.38904	5.76302	7.62435	9.14009
BnaAGO2-2	18.9729	19.4719	37.2566	35.2776
BnaAGO2-3	15.1191	14.7879	21.7703	34.4801
BnaAGO2-4	9.59318	7.80583	11.1764	19.9718
BnaAGO5-1	4.39642	6.18738	18.6612	19.5805
BnaAGO5-2	39.3599	51.1809	77.4613	81.2704
BnaAGO10-1	9.60263	9.39394	19.9262	18.7885
BnaAGO10-2	9.98573	9.88757	14.098	18.2023
BnaAGO1-1	37.8451	31.2553	49.7566	47.4284
BnaAGO1-2	27.5487	24.8229	43.3464	34.5604
BnaAGO1-3	40.9944	40.6174	61.1233	53.5582
BnaAGO1-4	22.5464	22.5846	39.46	30.1534
