# Supplementary material for: Genome-Wide Identification and Posttranscriptional Regulation Analyses Elucidate Roles of Key Argonautes and Their miRNA Triggers in Regulating Complex Yield Traits in Rapeseed
Source: Int J Mol Sci. 2023 Jan 28;24(3):2543. doi: 10.3390/ijms24032543 (PMC9916703; doi:10.3390/ijms24032543)
Supplement: Supplementary file 1 [file ijms-24-02543-s001.zip › Table S4.xlsx]

## Sheet: TSW
	LTSW_15P	HTSW_15P	LTSW_35P	HTSW_35P	LTSW_15S	HTSW_15S	LTSW_35S	HTSW_35S
bna-miR168a	18.445	0.28	49.085	2.77667	6.5	0.4	7.61333	4.57667
bna-miR403	372.655	779.22	9.905	692.053	1.075	36.98	439.715	788.115

## Sheet: SPS 
	LSPS-Pi	HSPS-Pi	LSPS-Si	HSPS-Si
bna-miR168a	3853.47	3752.7	6242.34	3456.93
bna-miR403	5629.27	4300.62	9981.29	5401.52

## Sheet: IEN
	LIEN-Pi	HIEN-Pi	LIEN-Bu	HIEN-Bu
bna-miR168a	3107.22	3513.74	3003.36	4538.28
bna-miR403	4320.73	5328.67	6938.69	7618.01
