# Supplementary material for: Genome-Wide Identification and Posttranscriptional Regulation Analyses Elucidate Roles of Key Argonautes and Their miRNA Triggers in Regulating Complex Yield Traits in Rapeseed
Source: Int J Mol Sci. 2023 Jan 28;24(3):2543. doi: 10.3390/ijms24032543 (PMC9916703; doi:10.3390/ijms24032543)
Supplement: Supplementary file 1 [file ijms-24-02543-s001.zip › Table S5.xlsx]

## Sheet: Sheet1
Table S5. Primers used for qRT-PCR analysis and Bna-MIR168a clone
Primer name	Primer Sequence（5'-3'）
G-miR168a F	CACCGCATGAATGGTCTGTTATTCTC
G-miR168a R	GCATAGCCATTAATCATCATGCG
AtIPS1F	CACCCAAACACCACAAAAACAAAAG
AtIPS1R	AGGAAGTCACTATAAAGAGAAT
MIM-miR168a F	TTCCCGACCTGCTACACCAAGCGAAGCTTCGGTTCCCCTCGGAATC
MIM-miR168a R	TCGCTTGGTGTAGCAGGTCGGGAATTTCTAGAGGGAGATAAAC
M13F	GTAAAACGACGGCCAGT
M13R	CAGGAAACAGCTATGAC
Bar F	TCTGCACCATCGTCAACCACTAC
Bar R	CGGTACCGGCAGGCTGAAGTC
F35SND	GGAAGTTCATTTCATTTGGAGAG
RPA3ND	GCTGCATAATTCTCGGGGCAGCA
qAtSPSA2 F	AAACCGCCTGGAACCGGCGATTCC
qAtSPSA2 R	TTGTGTTACGCTCTTGCGGACTCCTG
BnACT7 F	TGGGTTTGCTGGTGACGAT
BnACT7 R	TGCCTAGGACGACCAACAATACT
BnU6s	TTGGAACGATACAGAGAAGATTAGCA
AtActin7 F	GGTGTCATGGTTGGTATGGGTC
AtActin7 R	CCTCTGTGAGTAGAACTGGGTGC
qMIR168a F	TTACGGCGGCCTCTGACTCG
qMIR168a R	TCACGTCGGACTCGGATTCAC
qBnC08g46720D F	TTGACTTGTATCGTGAGTCACA
qBnC08g46720D R	CTCGTCATGAAGCAAGATTCTG
qBnA08g03260D F	CGAAACATATGGCTTTCGGATT
qBnA08g03260D R	CCTCTCGTTCAACCTTTTTGAG
qBnA05g17460D F	GACCAAGAGGAGGCCAGCCACC
qBnA05g17460D R	TGATTGTCTCTGCGGCAGTCCAGC
qAtAGO1 F	CCACCGCAGAGACAATCAG
qAtAGO1 R	GCTGAGCCAGAACAGTAGG
